1       **Comprehensive analyses reveal the impacts of vaccination status and**  
2               **physiological variables in early infection on viral persistence in**  
3               **COVID-19 patients: a retrospective single-center cohort study**

4       Xiangxiang Tian<sup>1,2,3,†</sup>, Yifan Zhang<sup>1,2,3,†</sup>, Wanhai Wang<sup>3</sup>, Fang Fang<sup>4</sup>,  
5       Wenhong Zhang<sup>2,5</sup>, Yanmin Wan<sup>2,5,6,\*</sup>, Zhaoqin Zhu<sup>1,\*</sup>

6  
7       <sup>1</sup> Department of Laboratory Medicine, Shanghai Public Health Clinical Center,  
8       Fudan University, Shanghai, China; <sup>2</sup> Department of Infectious Diseases,  
9       Shanghai Key Laboratory of Infectious Diseases and Biosafety Emergency  
10       Response, National Medical Center for Infectious Diseases, Huashan Hospital,  
11       Fudan University, Shanghai, China; <sup>3</sup> Clinical Laboratory, The First Affiliated  
12       Hospital of Zhengzhou University, Key Laboratory of Laboratory Medicine of  
13       Henan Province, Zhengzhou, China; <sup>4</sup> Shanghai Public Health Clinical Center,  
14       Fudan University, Shanghai, China; <sup>5</sup> Department of radiology, Shanghai  
15       Public Health Clinical Center, Fudan University, Shanghai, China; <sup>6</sup> State Key  
16       Laboratory of Genetic Engineering, School of Life Science, Fudan University,  
17       Shanghai, China.

18       <sup>†</sup>These authors contribute equally to this work.

19       \*Address correspondence to: Y.W., #12 Middle Wulumuqi Road, Shanghai  
20       200040, China; e-mail: [yanmin\\_wan@fudan.edu.cn](mailto:yanmin_wan@fudan.edu.cn). Z.Z., #2901 Caolang  
21       Road, Shanghai 201508, China; e-mail: [zhaoqinzhu@163.com](mailto:zhaoqinzhu@163.com).

22       **Keywords:** COVID-19, inactivated vaccine, mRNA vaccine, laboratory  
23       variables, viral RNA shedding

24  
25       **Running head:** Host factors can predict SARS-CoV-2 persistence

26 **Abstract**

27 **BACKGROUND:** Viral persistence is a crucial factor that influences the  
28 communicability of SARS-CoV-2 infection. However, the impacts of  
29 vaccination status and physiological variables on viral RNA shedding have not  
30 been adequately clarified.

31 **METHODS:** In this study, we retrospectively collected the clinical records of  
32 377 hospitalized COVID-19 patients, which contained unvaccinated patients  
33 and patients received two doses of an inactivated vaccine or an mRNA vaccine.  
34 Firstly, we analyzed the impacts of vaccination on disease severity and viral  
35 RNA persistence. Next, to clarify the impacts of physiological variables on viral  
36 RNA shedding in COVID-19 patients, we retrieved 49 laboratory variables and  
37 analyzed their correlations with the duration of viral RNA shedding. Finally, we  
38 established a multivariate regression model to predict the duration of viral RNA  
39 shedding.

40 **RESULTS:** Our results showed that both inactivated and mRNA vaccines  
41 significantly reduced the rate of moderate cases, while the vaccine related  
42 shortening of viral RNA shedding were only observed in moderate patients.  
43 Correlation analysis showed that 10 significant laboratory variables were  
44 shared by the unvaccinated mild patients and mild patients inoculated with an  
45 inactivated vaccine, but not by the mild patients inoculated with an mRNA  
46 vaccine. Moreover, we demonstrated that a multivariate regression model  
47 established based on the variables correlating with viral persistence in  
48 unvaccinated mild patients could predict the duration of viral shedding for all  
49 groups of patients.

50 **CONCLUSIONS:** Vaccination contributed limitedly to the clearance viral RNA  
51 in COVID-19 patients. While, laboratory variables in early infection could  
52 predict the persistence of viral RNA.

53

54

55

## 56 **Introduction**

57 Real world studies suggest that the implementing of vaccination have  
58 dramatically reduced the rates of SARS-CoV-2 infection and SARS-CoV-2  
59 related hospitalization, admission to intensive care unit and death (1-3). In  
60 addition, retrospective estimations have also suggested that vaccines were  
61 effective at preventing the transmission of both the Alpha (4, 5) and the Delta  
62 variants (6). It is believed that the vaccine mediated reduction of transmission  
63 relies on the prevention of infection, while the effect of vaccines in preventing  
64 onward transmission after breakthrough infections has not been adequately  
65 clarified.

66 It is postulated that vaccines may help to restrain the onward transmission of  
67 SARS-CoV-2 (7) based on observations that COVID-19 vaccination can  
68 reduce viral loads in nasal mucosa (8-10). However, contradictory evidence  
69 showed that the viral loads of breakthrough infections after full vaccination  
70 were similar with those in unvaccinated individuals (11, 12). More recently, a  
71 preprint study carried out in a prison demonstrated that there was no  
72 significant difference in the duration of RT-PCR positivity and the kinetics of Ct  
73 values between fully vaccinated participants and those not fully vaccinated  
74 (13).

75 Given that the duration of virus shedding may have crucial impact on the  
76 onward transmission of SARS-CoV-2, in this study, we retrieved the clinical  
77 records of 377 hospitalized COVID-19 patients and analyzed the impacts of  
78 vaccination status and physiological variables in early infection on the duration  
79 of viral RNA shedding. Comparisons between fully vaccinated and  
80 unvaccinated patients showed that vaccination shortened the duration of viral  
81 RNA shedding among moderate COVID-19 patients, while showed no effect in  
82 constraining the duration of viral RNA shedding among mild COVID-19  
83 patients. Furthermore, we showed that vaccination status impacted the  
84 association between individual physiological parameters and the duration of  
85 viral RNA shedding. Nonetheless, multivariate regression analyses showed

86 that variables correlated with viral persistence in unvaccinated mild patients  
87 could predict the duration of viral RNA shedding for all groups of patients.

88

## 89 **Materials and methods**

### 90 **Ethics statement**

91 This study was approved by the Research Ethics Review Committee (Ethics  
92 Approval Number: YJ-2020-S080-02) of the Shanghai Public Health Clinical  
93 Center Affiliated to Fudan University.

94

### 95 **Study design and participants**

96 377 COVID-19 patients hospitalized in Shanghai Public Health Clinical Center  
97 during the period from January 2020 to mid-January 2022 were included in this  
98 study. The diagnosis and clinical management of COVID-19 patients were  
99 conducted following the Diagnosis and Treatment Protocol for Novel  
100 Coronavirus Pneumonia released by National Health Commission & National  
101 Administration of Traditional Chinese Medicine (14). The demographic and  
102 COVID-19 vaccination information was depicted in [Table 1](#). 49 laboratory  
103 variables detected at the immediate early stage of infection and the duration of  
104 viral RNA shedding were shown in [Supplemental table 1](#). The duration of viral  
105 RNA shedding was defined as the period from the initial nasal swab RT-PCR  
106 positivity to the final nasal swab RT-PCR positivity. Patients with identified  
107 comorbidities were excluded from this study.

108

### 109 **SARS-CoV-2 viral RNA detection**

110 Viral RNA extraction was performed using an automatic nucleic acid extractor  
111 (Bioperfectus technologies Co., LTD., Jiangsu, China). 2019-nCoV nucleic  
112 acid detection kit (Bioperfectus technologies Co., LTD., Jiangsu, China) and  
113 ABI 7500 real-time fluorescence quantitative PCR (qPCR) instrument (Thermo  
114 Fisher Technology Co., LTD., Shanghai, China) were used to detect  
115 SARS-CoV-2 genomic RNA. When the Ct values of both ORF1ab and N gene

116 of 2019-nCoV are  $\leq 37$  and the amplification curve is “S-shaped”, the result is  
117 defined as positive. When the Ct values of both genes are  $> 40$  or  
118 undetermined, the result is defined as negative. When the Ct value is between  
119 37~40, the sample would be re-examined.

120

## 121 **Laboratory measurements**

122 All the laboratory tests were carried out following manufacturers` instructions  
123 in the department of laboratory medicine of Shanghai Public Health Clinical  
124 Center. All the tests had passed the ISO15189 accreditation. In this study, we  
125 retrospectively retrieved the values of 49 laboratory variables ([Supplemental](#)  
126 [table 1](#)) for each patient, which were measured at a median of 3 days post  
127 diagnosis.

128

## 129 **Statistical analysis**

130 Quantitative data were examined for normality using the Shapiro–Wilk test  
131 before all downstream analyses except the Chi square test. Means for  
132 variables with a normal distribution were compared using the two-tailed  
133 parametric t-test and with the two-tailed non-parametric t-test when  
134 distributions of data departed from normality. Pearson correlation was used for  
135 correlation analyses of normally distributed data and Spearman correlation  
136 was used for analyses of non-normally distributed data. Multivariate regression  
137 analyses were performed for variables with statistical significance by the  
138 correlation analysis.  $P \leq 0.05$  was considered as statistically significant. All the  
139 statistical analyses were conducted using Graphpad Prism 9 (GraphPad  
140 Software, USA).

141

## 142 **Results**

143 **Vaccines reduced the proportion of the moderate cases and shortened**  
144 **the duration of viral RNA shedding among moderate COVID-19 patients**

145 In this study, we retrospectively retrieved the clinical records of 377 COVID-19

146 patients hospitalized in Shanghai Public Health Clinical Center during the  
147 period from January 2020 to mid-January 2022. Among these patients, 165  
148 received two doses of an inactivated vaccine, 41 received two doses of an  
149 mRNA vaccine and 171 were not vaccinated (W/O vaccination) (Table 1). The  
150 median age was similar across all groups ( $P=0.5651$ ), and the mean  
151 time-since-vaccination of patients inoculated with an inactivated vaccine was  
152 comparable with that of patients inoculated with an mRNA vaccine ( $P=0.1183$ )  
153 (Table 1). The gender composition of patients inoculated with an mRNA  
154 vaccine was significantly different from the other two groups, which contained  
155 more female ( $P = 0.0011$ ) (Table 1), but it did not impact the duration of viral  
156 RNA shedding and the severity of disease (Supplemental figure 1).  
157 Compared with unvaccinated patients, patients inoculated with either an  
158 inactivated vaccine (19.4% vs 35.7%,  $P=0.0002$ ) or an mRNA vaccine (7.3%  
159 vs 35.7%,  $P=0.0001$ ) significantly reduced the incidence of moderate cases  
160 (Figure 1A). More interestingly, we found that patients inoculated with an  
161 inactivated vaccine showed significantly shorter duration of viral RNA shedding  
162 in moderate patients compared with unvaccinated patients (17, IQR  
163 12.25-19.5 vs 19, IQR 12-24.5,  $P=0.0382$ ) and patients inoculated with an  
164 mRNA vaccine (17, IQR 12.25-19.5 vs  $22.33 \pm 4.163$ ,  $P=0.0385$ ) (Figure 1B).  
165 However, the vaccines showed no effect in constraining the duration of viral  
166 RNA shedding in mild COVID-19 patients (Figure 1C).

167

168 **Common variables that correlated with the duration of viral RNA**  
169 **shedding were found in unvaccinated mild patients and mild patients**  
170 **inoculated with an inactivated vaccine, but not in those inoculated with**  
171 **an mRNA vaccine**

172 As aforementioned, the vaccines failed to constrain the duration of viral RNA  
173 shedding in mild COVID-19 patients (Figure 1C), which implies that vaccine  
174 induced immune responses might not play a pivotal role in determining viral  
175 persistence in these patients. To identify physiological variables that are

176 relevant to the duration of viral RNA shedding in the mild COVID-19 patients,  
177 we performed correlation analyses between the duration of viral RNA shedding  
178 and 49 laboratory variables detected at the immediate early stage of infection.  
179 Our data showed that 16 variables in unvaccinated patients (Figure 2A) and 15  
180 variables in patients inoculated with an inactivated vaccine (Figure 2B)  
181 correlated with the duration of viral RNA shedding, respectively. Of note, 10  
182 variables were shared by these two groups of mild patients, including 3  
183 positively correlated variables (Fibrinogen, Monocyte and IL-17) and 7  
184 negatively correlated variables (Neutrophil, Eosinophil, Basophil, CD4, CD8,  
185 CD19 and CD16CD56 cell counts). In contrast, in patients inoculated with an  
186 mRNA vaccine, only eGFR (estimated glomerular filtering rate) was found to  
187 correlate negatively with the duration of viral RNA shedding (Figure 2C). Next,  
188 we compared the laboratory variables among the three groups of mild  
189 COVID-19 patients and found that inoculations with an inactivated vaccine or  
190 an mRNA vaccine influenced the laboratory parameters differentially  
191 (Supplemental table 1). Patients inoculated with an mRNA vaccine mounted  
192 highest median IL-8 and IL-17 responses at the immediate early stage of  
193 infection (Supplemental table 1).

194

195 **Variables correlating with the duration of viral RNA shedding in**  
196 **unvaccinated mild patients could predict the duration of viral RNA**  
197 **shedding in all groups of patients**

198 Although multiple individual parameters were found to correlate significantly  
199 with the duration of viral RNA shedding, the correlation coefficients were low  
200 ( $|r| < 0.5$ ) (Figure 2), suggesting that the correlations were relatively weak.  
201 This notion was supported by the results of univariate logistic regression  
202 analyses, which showed that no individual variable could reliably discriminate  
203 between short duration of viral RNA shedding ( $\leq 14$  days) from long shedding  
204 duration ( $> 14$  days) in unvaccinated mild patients ( $AUC < 0.80$ ) (Supplemental  
205 figure 2). The count of CD19<sup>+</sup> B cell is of the highest discriminating efficiency

206 (AUC=0.7556) followed by the count of CD4<sup>+</sup> T cell (AUC=0.7261)  
207 ([Supplemental figure 2](#)). To further characterize the relationships between host  
208 factors and viral persistence, we performed multivariate logistic regression  
209 analyses leveraging the significant factors identified in the correlation analyses  
210 for unvaccinated mild patients. Our results showed that the selected laboratory  
211 variables discriminated between the short ( $\leq 14$  days) and long ( $> 14$  days) viral  
212 RNA shedding duration quite well for all the three groups of mild COVID-19  
213 patients. The area under the ROC curve (AUC) for unvaccinated patients,  
214 patients inoculated with an inactivated vaccine and patients inoculated with an  
215 mRNA vaccine were 0.9231, 0.8365 and 0.9508, respectively ([Figure](#)  
216 [3](#)). Moreover, we found that this multivariate regression model could also  
217 predict the duration of viral RNA shedding in moderate COVID-19 patients.  
218 The AUC for unvaccinated moderate patients and moderate patients  
219 inoculated with an inactivated vaccine were 0.9110 and 0.9514, respectively  
220 ([Figure 4](#)). Due the limited sample size (only three patients), the multivariate  
221 regression analysis could not be applied to moderate patients inoculated with  
222 an mRNA vaccine.

223

## 224 **Discussion**

225 An important factor that influences the transmission of SARS-CoV-2 is the  
226 period of communicability, which may be influenced by many factors. To  
227 identify these factors, detections of live virus and viral RNA are frequently used  
228 as indicators of communicability, of which the live virus culture is thought to be  
229 more relevant to the communicability of SARS-CoV-2 infections ([15-17](#)).  
230 However, the culture of live viruses is time-consuming and might be affected  
231 by specimen quality and the sensitivities of laboratory methods. Hence, as an  
232 alternative solution, the measurement of viral RNA shedding remains to be an  
233 important criterion for the diagnosis of COVID-19 and the discharge of  
234 hospitalized patients ([18](#)).

235 Multiple factors have been found to associate with prolonged viral RNA



236 shedding in previous studies, such as old age (19), compromised immune  
237 status (20), treatment with corticosteroids (21-23) and disease severity (24,  
238 25). Meanwhile, biological sex and comorbidities, such as hypertension and  
239 diabetes, were found not to associate with the viral RNA shedding (26-28).  
240 Unlike most previous works, our current study investigated the impacts of  
241 vaccination status and multiple laboratory variables in early infection on the  
242 duration of viral RNA shedding.

243 First of all, we compared the ratios of moderate COVID-19 cases among  
244 unvaccinated patients and patients fully vaccinated with either an inactivated  
245 vaccine or an mRNA vaccine. Our data showed that both the inactivated and  
246 the mRNA vaccines significantly reduced the incidence of moderate cases,  
247 which is in consistence with the observation of a previous real-world study (29).  
248 Next, we compared the duration of viral RNA shedding between unvaccinated  
249 and fully vaccinated patients. Quite unexpectedly, our results showed that  
250 vaccination significantly shortened the duration of virus shedding in moderate  
251 patients but not in mild patients, suggesting that vaccine induced specific  
252 immune responses did not contribute significantly to constraining viral  
253 persistence in mild patients. We were not able to elaborate the underlying  
254 mechanism in this retrospective study. However, as previous studies  
255 suggested that more severe COVID-19 could usually evoke stronger host  
256 immune responses (30, 31), we speculate that the memory immune responses  
257 established by vaccination could be more efficiently activated in moderate  
258 patients, which may control the in vivo virus replication better.

259 Next, to characterize host factors that may affect viral persistence in mild  
260 COVID-19 patients, we retrieved 49 laboratory variables which were detected  
261 at the immediate early stage after infection (at a median of 3 days post  
262 diagnosis). Correlation analyses showed that the plasma levels of IL-17,  
263 fibrinogen and the counts of peripheral leucocytes were associated with the  
264 duration of viral RNA shedding in both unvaccinated patients and patients  
265 inoculated with an inactivated vaccine. Elevated levels of proinflammatory

266 cytokines and lymphopenia have been demonstrated to be associated with  
267 prolonged viral RNA shedding by previous studies (32-34). Here, we further  
268 showed that the counts of T, B, NK, neutrophil and eosinophil were negatively  
269 associated with the duration of viral RNA shedding, while the count of  
270 monocyte was positively associated with the duration of viral RNA shedding.  
271 More intriguingly, our data showed that all the significant individual variables  
272 identified in unvaccinated patients and patients inoculated with an inactivated  
273 vaccine were not significantly associated with the duration of viral RNA  
274 shedding in patients inoculated with an mRNA vaccine. This phenomenon  
275 implies that the mRNA vaccine may have unique impacts on host responses  
276 after break through infection. And these impacts might be deleterious, because  
277 the median duration of viral RNA shedding of patients inoculated with an  
278 mRNA vaccine tended to be longer than those of unvaccinated patients and  
279 patients inoculated with an inactivated vaccine. Insight into the underlying  
280 mechanisms will help to improve our understanding of the biological effect of  
281 mRNA vaccine.

282 At the end of this study, we established a multivariate regression model using  
283 the individual factors correlating with the duration of viral RNA shedding in  
284 unvaccinated mild patients and found that the model could be applied to all  
285 groups of patients, including the mild patients inoculated with an mRNA  
286 vaccine and the moderate patients. This finding suggests that despite of the  
287 impacts of vaccination status and the difference of disease severity, the  
288 combined effect of host factors on viral persistence remains stable.

289 Several limitations of the present study should be noted. First, antigen-specific  
290 immune responses were not detected in this retrospective work. Nonetheless,  
291 we speculate that the vaccine induce immunities might not be able to constrain  
292 viral RNA shedding in mild COVID-19 patients, since both an inactivated  
293 vaccine and an mRNA vaccine failed to shorten the duration of viral RNA  
294 shedding in these patients. Second, although a previous study showed that  
295 viral RNA load ( $>10^7$  copies/ml) is an independent risk factor for live virus

296 shedding (35), the detection viral RNA might not always indicate the presence  
297 of live viruses. Further investigations are necessitated to characterize host  
298 factors that associate with the shedding of viable viruses. Third, most cases  
299 enrolled in this study were infected by either the D614G variant or the Delta  
300 variant, but we were not able to define the infected variant for each case.  
301 Therefore, the impact of viral factor on the duration of viral RNA shedding is  
302 out-of-scope for this study.

303 Despite of these limitations, our study showed for the first time that COVID-19  
304 vaccines contributed to the clearance viral RNA in moderate cases, while failed  
305 to shorten the duration of viral RNA shedding in mild patients. Moreover, we  
306 identified a set of laboratory variables in early infection that could predict the  
307 persistence of viral RNA. These findings may serve as a rationale to optimize  
308 the control measures for COVID-19 pandemic.

309

310 **Author contributions:** *All authors confirmed they have contributed to*  
311 *the intellectual content of this paper and have met the following*  
312 *4 requirements: (a) significant contributions to the conception and*  
313 *design, acquisition of data, or analysis and interpretation of data; (b)*  
314 *drafting or revising the article for intellectual content; (c) final approval of the*  
315 *published article; and (d) agreement to be accountable for*  
316 *all aspects of the article thus ensuring that questions related to the accuracy or*  
317 *integrity of any part of the article are appropriately investigated*  
318 *and resolved.*

319 ZZ and YW designed and supervised the study; XT and YZ collected the data;  
320 YW, XT and YZ analyzed the data; XT and YZ drafted the manuscript; YW, ZZ  
321 and WZ revised the manuscript. The underlying data have been verified by FF,  
322 ZZ and YW.

323

324 **Authors' Disclosures or Potential Conflicts of Interest:** *Upon manuscript*  
325 *submission, all authors completed the author disclosure form.*

326 *Disclosures and/or potential conflicts of interest:*

327 **Employment or Leadership:** None declared.

328 **Consultant or Advisory Role:** None declared.

329 **Stock Ownership:** None declared.

330 **Honoraria:** None declared.

331 **Research Funding:** This work was partly supported by a grant from the  
332 National Natural Science Foundation of China (81971559), a grant from the  
333 major project of Study on Pathogenesis and Epidemic Prevention Technology  
334 System (2021YFC2302500) by the Ministry of Science and Technology of  
335 China and a grant from the Science and Technology Commission of Shanghai  
336 Municipality (21NL2600100).

337 **Expert Testimony:** None declared.

338 **Patents:** None declared.

339 **Role of Sponsor:** The funding organizations played no role in the design of  
340 study, choice of enrolled patients, review and interpretation of data,  
341 preparation of manuscript, or final approval of manuscript.

342

### 343 **Acknowledgments**

344 We thank Dr. Liqiu Jia and Ms. Jing Wang for their help in retrieving the clinical  
345 records of the COVID-19 patients.

346

### 347 **References**

- 348 1. Liu Q, Qin C, Liu M, Liu J. Effectiveness and safety of SARS-CoV-2 vaccine in real-world  
349 studies: a systematic review and meta-analysis. *Infect Dis Poverty* 2021;10:132.
- 350 2. Zheng C, Shao W, Chen X, Zhang B, Wang G, Zhang W. Real-world effectiveness of  
351 COVID-19 vaccines: a literature review and meta-analysis. *Int J Infect Dis*  
352 2022;114:252-60.
- 353 3. Hungerford D, Cunliffe NA. Real world effectiveness of covid-19 vaccines.  
354 2021;374:n2034.
- 355 4. Shah ASV, Gribben C, Bishop J, Hanlon P, Caldwell D, Wood R, et al. Effect of Vaccination  
356 on Transmission of SARS-CoV-2. *N Engl J Med* 2021;385:1718-20.
- 357 5. Harris RJ, Hall JA, Zaidi A, Andrews NJ, Dunbar JK, Dabrera G. Effect of Vaccination on

- 358 Household Transmission of SARS-CoV-2 in England. *N Engl J Med* 2021;385:759-60.
- 359 6. Eyre DW, Taylor D, Purver M, Chapman D, Fowler T, Pouwels KB, et al. The impact of  
360 SARS-CoV-2 vaccination on Alpha & Delta variant transmission. Preprint at  
361 <https://www.medrxiv.org/content/10.1101/2021.09.28.21264260v1> (2021).
- 362 7. Vitiello A, Ferrara F, Troiano V, La Porta R. COVID-19 vaccines and decreased  
363 transmission of SARS-CoV-2. *Inflammopharmacology* 2021;29:1357-60.
- 364 8. Callaway E. Delta coronavirus variant: scientists brace for impact. *Nature* 2021;595:17-8.
- 365 9. Levine-Tiefenbrun M, Yelin I, Katz R, Herzel E, Golan Z, Schreiber L, et al. Initial report of  
366 decreased SARS-CoV-2 viral load after inoculation with the BNT162b2 vaccine. *Nat Med*  
367 2021;27:790-2.
- 368 10. Levine-Tiefenbrun M, Yelin I, Alapi H, Katz R, Herzel E, Kuint J, et al. Viral loads of  
369 Delta-variant SARS-CoV-2 breakthrough infections after vaccination and booster with  
370 BNT162b2. *Nat Med* 2021;27:2108-10.
- 371 11. Pouwels KB, Pritchard E, Matthews PC, Stoesser N, Eyre DW, Vihta K-D, et al. Impact of  
372 Delta on viral burden and vaccine effectiveness against new SARS-CoV-2 infections in  
373 the UK. Preprint at <https://www.medrxiv.org/content/10.1101/2021.08.18.21262237v1>  
374 (2021).
- 375 12. Riemersma KK, Grogan BE, Kita-Yarbro A, Halfmann PJ, Segaloff HE, Kocharian A, et al.  
376 Shedding of Infectious SARS-CoV-2 Despite Vaccination. Preprint at  
377 <https://www.medrxiv.org/content/10.1101/2021.07.31.21261387v2> (2021).
- 378 13. Salvatore PP, Lee CC, Sleweon S, McCormick DW, Nicolae L, Knipe K, et al. Transmission  
379 potential of vaccinated and unvaccinated persons infected with the SARS-CoV-2 Delta  
380 variant in a federal prison, July—August 2021. Preprint at  
381 <https://www.medrxiv.org/content/10.1101/2021.11.12.21265796v1> (2021).
- 382 14. Diagnosis and Treatment Protocol for Novel Coronavirus Pneumonia (Trial Version 7).  
383 *Chin Med J* 2020;133:1087-95.
- 384 15. Manzulli V, Scioscia G, Giganti G, Capobianchi MR, Lacedonia D, Pace L, et al. Real Time  
385 PCR and Culture-Based Virus Isolation Test in Clinically Recovered Patients: Is the Subject  
386 Still Infectious for SARS-CoV2? *J Clin Med* 2021;10:309.
- 387 16. Huang CG, Lee KM, Hsiao MJ, Yang SL, Huang PN, Gong YN, et al. Culture-Based Virus

- 388 Isolation To Evaluate Potential Infectivity of Clinical Specimens Tested for COVID-19. J  
389 Clin Microbiol 2020;58:e01068-e20.
- 390 17. Jefferson T, Spencer EA, Brassey J, Heneghan C. Viral Cultures for Coronavirus Disease  
391 2019 Infectivity Assessment: A Systematic Review. Clin Infect Dis 2021;73:e3884-e99.
- 392 18. Jin YH, Zhan QY, Peng ZY, Ren XQ, Yin XT, Cai L, et al. Chemoprophylaxis, diagnosis,  
393 treatments, and discharge management of COVID-19: An evidence-based clinical  
394 practice guideline (updated version). Mil Med Res 2020;7:41.
- 395 19. Cevik M, Tate M, Lloyd O, Maraolo AE, Schafers J, Ho A. SARS-CoV-2, SARS-CoV, and  
396 MERS-CoV viral load dynamics, duration of viral shedding, and infectiousness: a  
397 systematic review and meta-analysis. Lancet Microbe 2021;2:e13-e22.
- 398 20. Zhu L, Gong N, Liu B, Lu X, Chen D, Chen S, et al. Coronavirus Disease 2019 Pneumonia  
399 in Immunosuppressed Renal Transplant Recipients: A Summary of 10 Confirmed Cases in  
400 Wuhan, China. Eur Urol 2020;77:748-54.
- 401 21. Hu F, Yin G, Chen Y, Song J, Ye M, Liu J, et al. Corticosteroid, oseltamivir and delayed  
402 admission are independent risk factors for prolonged viral shedding in patients with  
403 Coronavirus Disease 2019. Clin Respir J 2020;14:1067-75.
- 404 22. Liu W, Liu Y, Xu Z, Jiang T, Kang Y, Zhu G, et al. Clinical characteristics and predictors of  
405 the duration of SARS-CoV-2 viral shedding in 140 healthcare workers. J Intern Med  
406 2020;288:725-36.
- 407 23. Qi L, Yang Y, Jiang D, Tu C, Wan L, Chen X, et al. Factors associated with the duration of  
408 viral shedding in adults with COVID-19 outside of Wuhan, China: a retrospective cohort  
409 study. Int J Infect Dis 2020;96:531-7.
- 410 24. Park M, Pawliuk C, Nguyen T, Griffitt A, Dix-Cooper L, Fourik N, et al. Determining the  
411 period of communicability of SARS-CoV-2: A rapid review of the literature. Preprint at  
412 <https://www.medrxiv.org/content/10.1101/2020.07.28.20163873v1>
- 413 25. Fontana LM, Villamagna AH, Sikka MK, McGregor JC. Understanding viral shedding of  
414 severe acute respiratory coronavirus virus 2 (SARS-CoV-2): Review of current literature.  
415 Infect Control Hosp Epidemiol 2021;42:659-68.
- 416 26. Stehlik P, Alcorn K, Jones A, Schlebusch S, Wattiaux A, Henry DA. Repeat testing for  
417 SARS-CoV-2: persistence of viral RNA is common, and clearance is slower in older

- 418 people. *Med J Aust* 2021;214:468-70.
- 419 27. Xu K, Chen Y, Yuan J, Yi P, Ding C, Wu W, et al. Factors Associated With Prolonged Viral  
420 RNA Shedding in Patients with Coronavirus Disease 2019 (COVID-19). *Clin Infect Dis*  
421 2020;71:799-806.
- 422 28. Zhou C, Zhang T, Ren H, Sun S, Yu X, Sheng J, et al. Impact of age on duration of viral  
423 RNA shedding in patients with COVID-19. *Aging (Albany NY)* 2020;12:22399-404.
- 424 29. Tenforde MW, Self WH, Adams K, Gaglani M, Ginde AA, McNeal T, et al. Association  
425 Between mRNA Vaccination and COVID-19 Hospitalization and Disease Severity. *Jama*  
426 2021;326:2043-54.
- 427 30. Mariën J, Ceulemans A, Michiels J, Heyndrickx L, Kerkhof K, Foque N, et al. Evaluating  
428 SARS-CoV-2 spike and nucleocapsid proteins as targets for antibody detection in severe  
429 and mild COVID-19 cases using a Luminex bead-based assay. *J Virol Methods*  
430 2021;288:114025.
- 431 31. Reynolds CJ, Swadling L, Gibbons JM, Pade C, Jensen MP, Diniz MO, et al. Discordant  
432 neutralizing antibody and T cell responses in asymptomatic and mild SARS-CoV-2  
433 infection. *Sci Immunol* 2020;5:eabf3698.
- 434 32. Gao C, Zhu L, Jin CC, Tong YX, Xiao AT, Zhang S. Proinflammatory cytokines are  
435 associated with prolonged viral RNA shedding in COVID-19 patients. *Clin Immunol*  
436 2020;221:108611.
- 437 33. Hao S, Lian J, Lu Y, Jia H, Hu J, Yu G, et al. Decreased B Cells on Admission Associated  
438 With Prolonged Viral RNA Shedding From the Respiratory Tract in Coronavirus Disease  
439 2019: A Case-Control Study. *J Infect Dis* 2020;222:367-71.
- 440 34. Mondì A, Lorenzini P, Castilletti C, Gagliardini R, Lalle E, Corpolongo A, et al. Risk and  
441 predictive factors of prolonged viral RNA shedding in upper respiratory specimens in a  
442 large cohort of COVID-19 patients admitted to an Italian reference hospital. *Int J Infect*  
443 *Dis* 2021;105:532-9.
- 444 35. van Kampen JJA, van de Vijver D, Fraaij PLA, Haagmans BL, Lamers MM, Okba N, et al.  
445 Duration and key determinants of infectious virus shedding in hospitalized patients with  
446 coronavirus disease-2019 (COVID-19). *Nat Commun* 2021;12:267.

447 **Table 1** Demographical characteristics of COVID-19 patients

448

449

450

451

452

453

454

455

456

457

458

459

460

461

462

463

464

465

466

467

468

|                                                    | Inactivated vaccine<br>(N=165) | mRNA vaccine<br>(N=41) | Without<br>vaccination<br>(N=171) | P value |
|----------------------------------------------------|--------------------------------|------------------------|-----------------------------------|---------|
| <b>Gender (n)</b>                                  |                                |                        |                                   |         |
| <b>Male</b>                                        | 126                            | 21                     | 105                               | 0.0011  |
| <b>Female</b>                                      | 39                             | 20                     | 66                                |         |
| <b>Age, Median (IQR)<br/>(Years)</b>               | 35.0 (25.0-44.0)               | 30.0 (25.0-46.5)       | 32.0 (24.0-44.0)                  | 0.5651  |
| <b>Time-since-vaccination<br/>(Mean±SD) (Days)</b> | 175.5±90.83                    | 146.0±63.63            | -                                 | 0.1183  |

**Note:** All the vaccinated patients received two doses of either an inactivated vaccine or an mRNA vaccine. Time-since-vaccination is defined as the period from the second dose of vaccination to the diagnosis of COVID-19.



469 **Figure legends**

470 **Figure 1 The impacts of vaccination on COVID-19 clinical manifestation**  
471 **and the duration of viral RNA shedding**

472 (A) The proportions of mild and moderate COVID-19 cases were compared  
473 among unvaccinated patients and patients inoculated with an inactivated  
474 vaccine or an mRNA vaccine. (B) Comparisons of the duration of viral RNA  
475 shedding among moderate COVID-19 patients. (C) Comparisons of the  
476 duration of viral RNA shedding among mild COVID-19 patients. Statistical  
477 analyses were performed by the method of non-parametric t-test.

478

479 **Figure 2 Correlation analyses between multiple laboratory variables and**  
480 **the duration of viral RNA shedding in different groups of mild COVID-19**  
481 **patients**

482 Data of 49 laboratory variables tested at the immediate early stage of infection  
483 were retrieved and correlations between each individual variable and the  
484 duration of viral RNA shedding were analyzed in unvaccinated mild patients  
485 (A), and mild patients inoculated with either an inactivated vaccine (B) or an  
486 mRNA vaccine (C), respectively. Variables that significantly correlated the  
487 duration of viral shedding ( $P < 0.05$ ) were shown in red. Correlation analyses  
488 were done using Pearson correlation for normally distributed data and  
489 Spearman correlation for non-normally distributed data. Volcano plots were  
490 constructed using an online software (<http://www.bioinformatics.com.cn>).

491

492 **Figure 3 Variables correlating with viral persistence in unvaccinated mild**  
493 **patients could discriminate between short ( $\leq 14$  days) and long ( $> 14$  days)**  
494 **duration of viral RNA shedding for all mild COVID-19 patients**

495 Multivariate regression model constructed using significant factors identified in  
496 unvaccinated mild patients discriminated between short and long duration of  
497 viral RNA shedding for unvaccinated mild patients (A) and mild patients  
498 inoculated with an inactivated vaccine (B) or an mRNA vaccine (C). NPV,

499 negative predictive value; PPV, positive predictive value.

500

501 **Figure 4 Variables correlating with viral persistence in unvaccinated mild**  
502 **patients could discriminate between short ( $\leq 14$  days) and long ( $> 14$  days)**  
503 **duration of viral RNA shedding for moderate COVID-19 patients**

504 Multivariate regression model constructed using significant factors identified in  
505 unvaccinated mild patients discriminated between short and long duration of  
506 viral RNA shedding for unvaccinated moderate patients (**A**) and moderate  
507 patients inoculated with an inactivated patients (**B**).

508

509

**Figure 1** The impacts of vaccination on COVID-19 clinical manifestation and the duration of viral RNA shedding

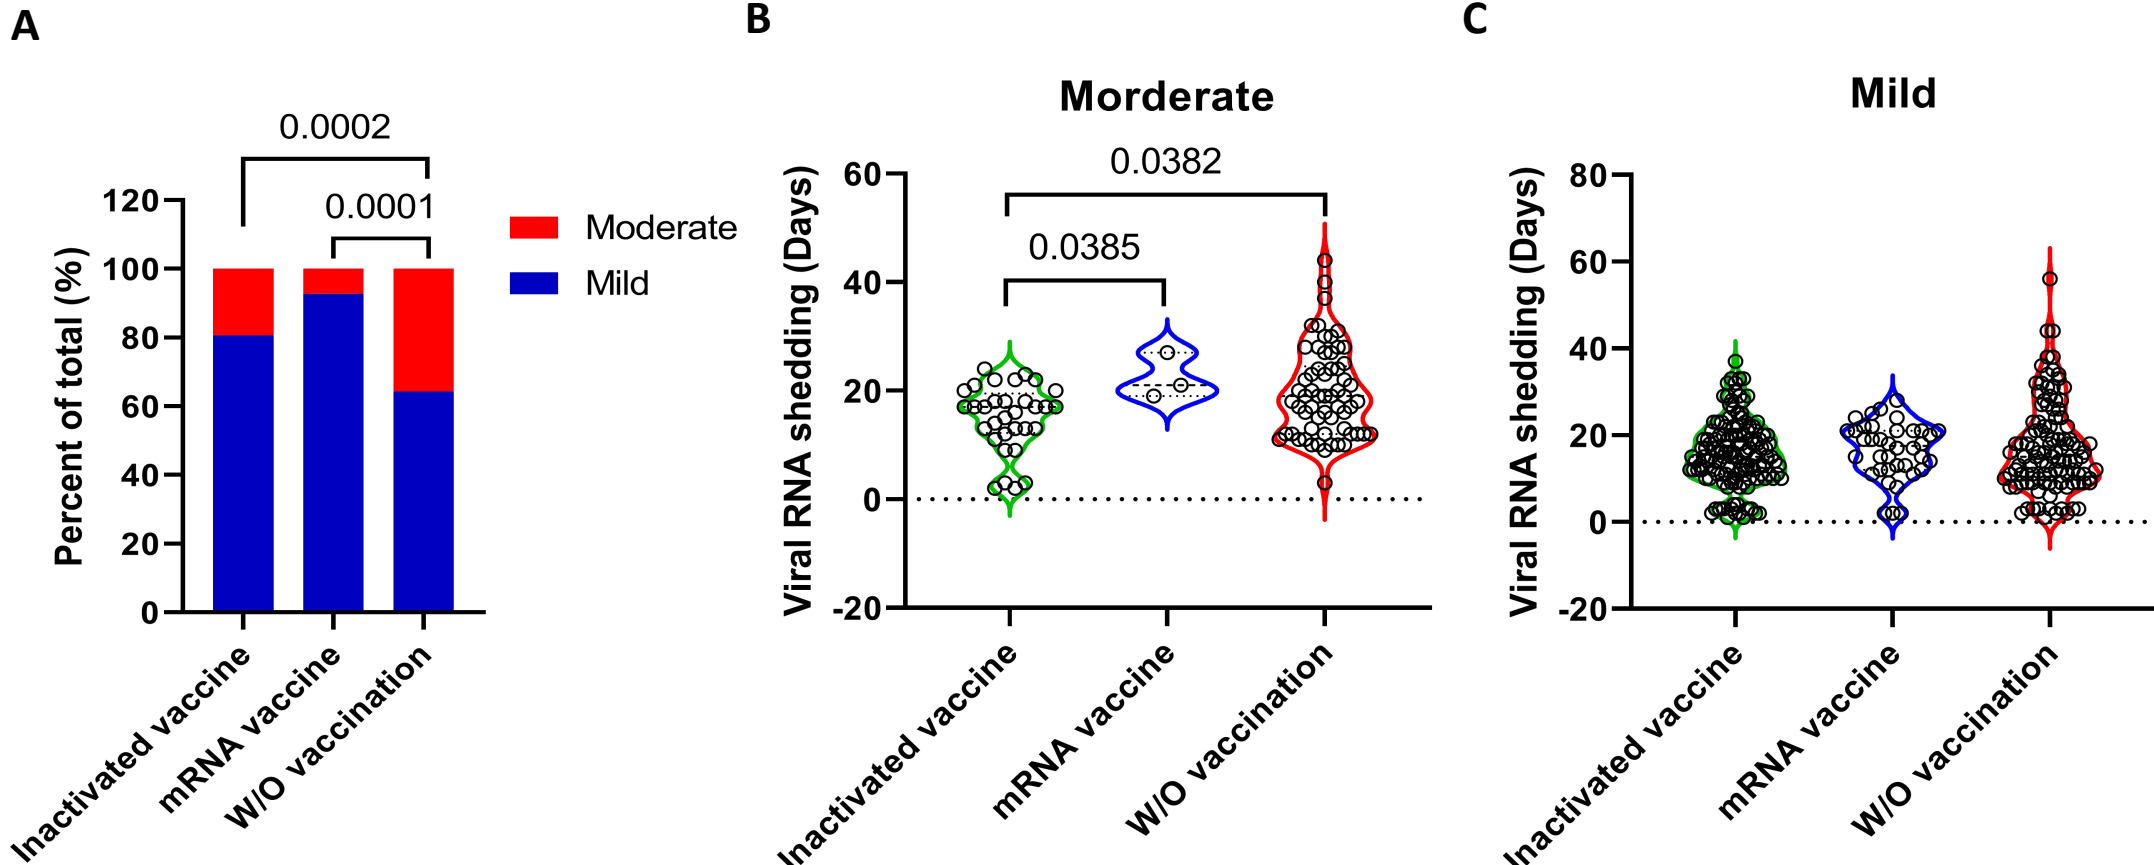

**Figure 2** Correlation analyses between multiple laboratory variables and the duration of viral RNA shedding in different groups of mild COVID-19 patients

**A**

**W/O vaccination**

● no correlation ● correlation

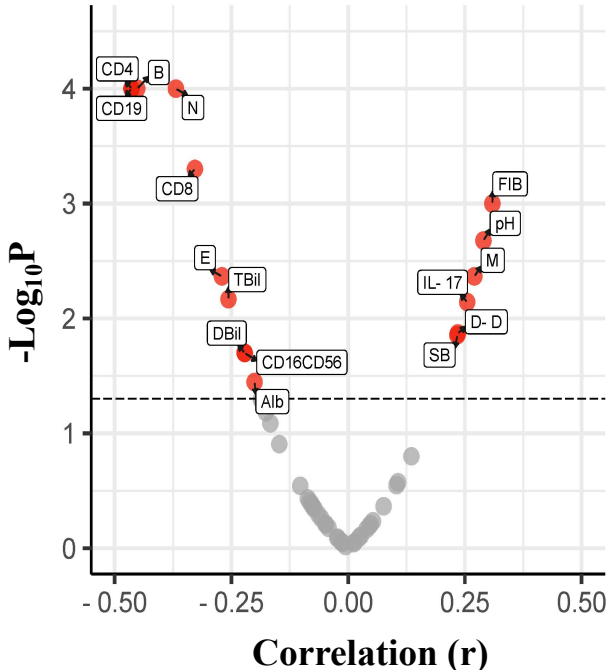

**B**

**Inactivated vaccine**

● no correlation ● correlation

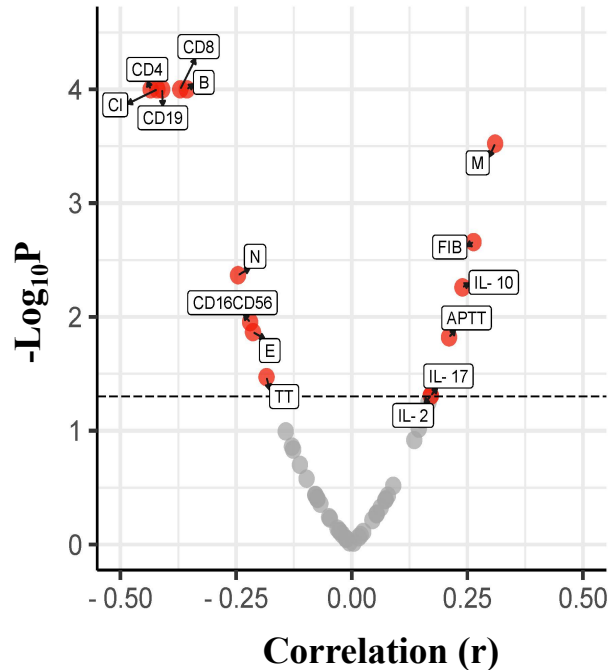

**C**

**mRNA vaccine**

● no correlation ● correlation

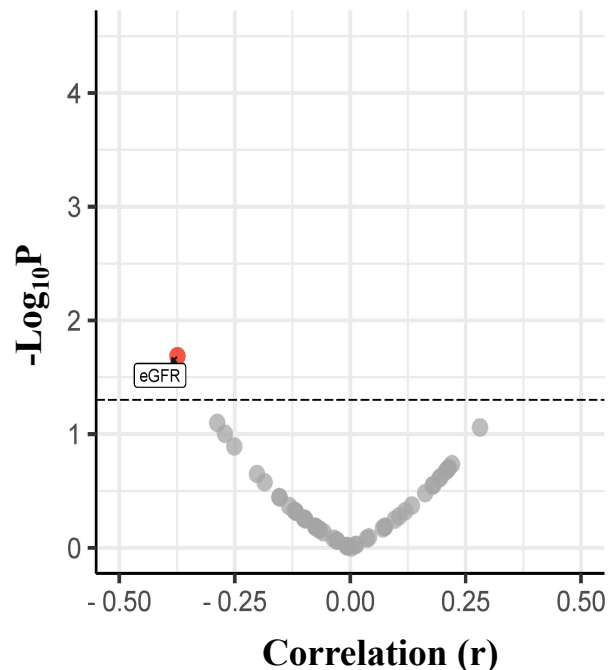

**Figure 3** Variables correlating with viral persistence in unvaccinated mild patients could discriminate between short ( $\leq 14$  days) and long ( $> 14$  days) duration of viral RNA shedding for all mild COVID-19 patients

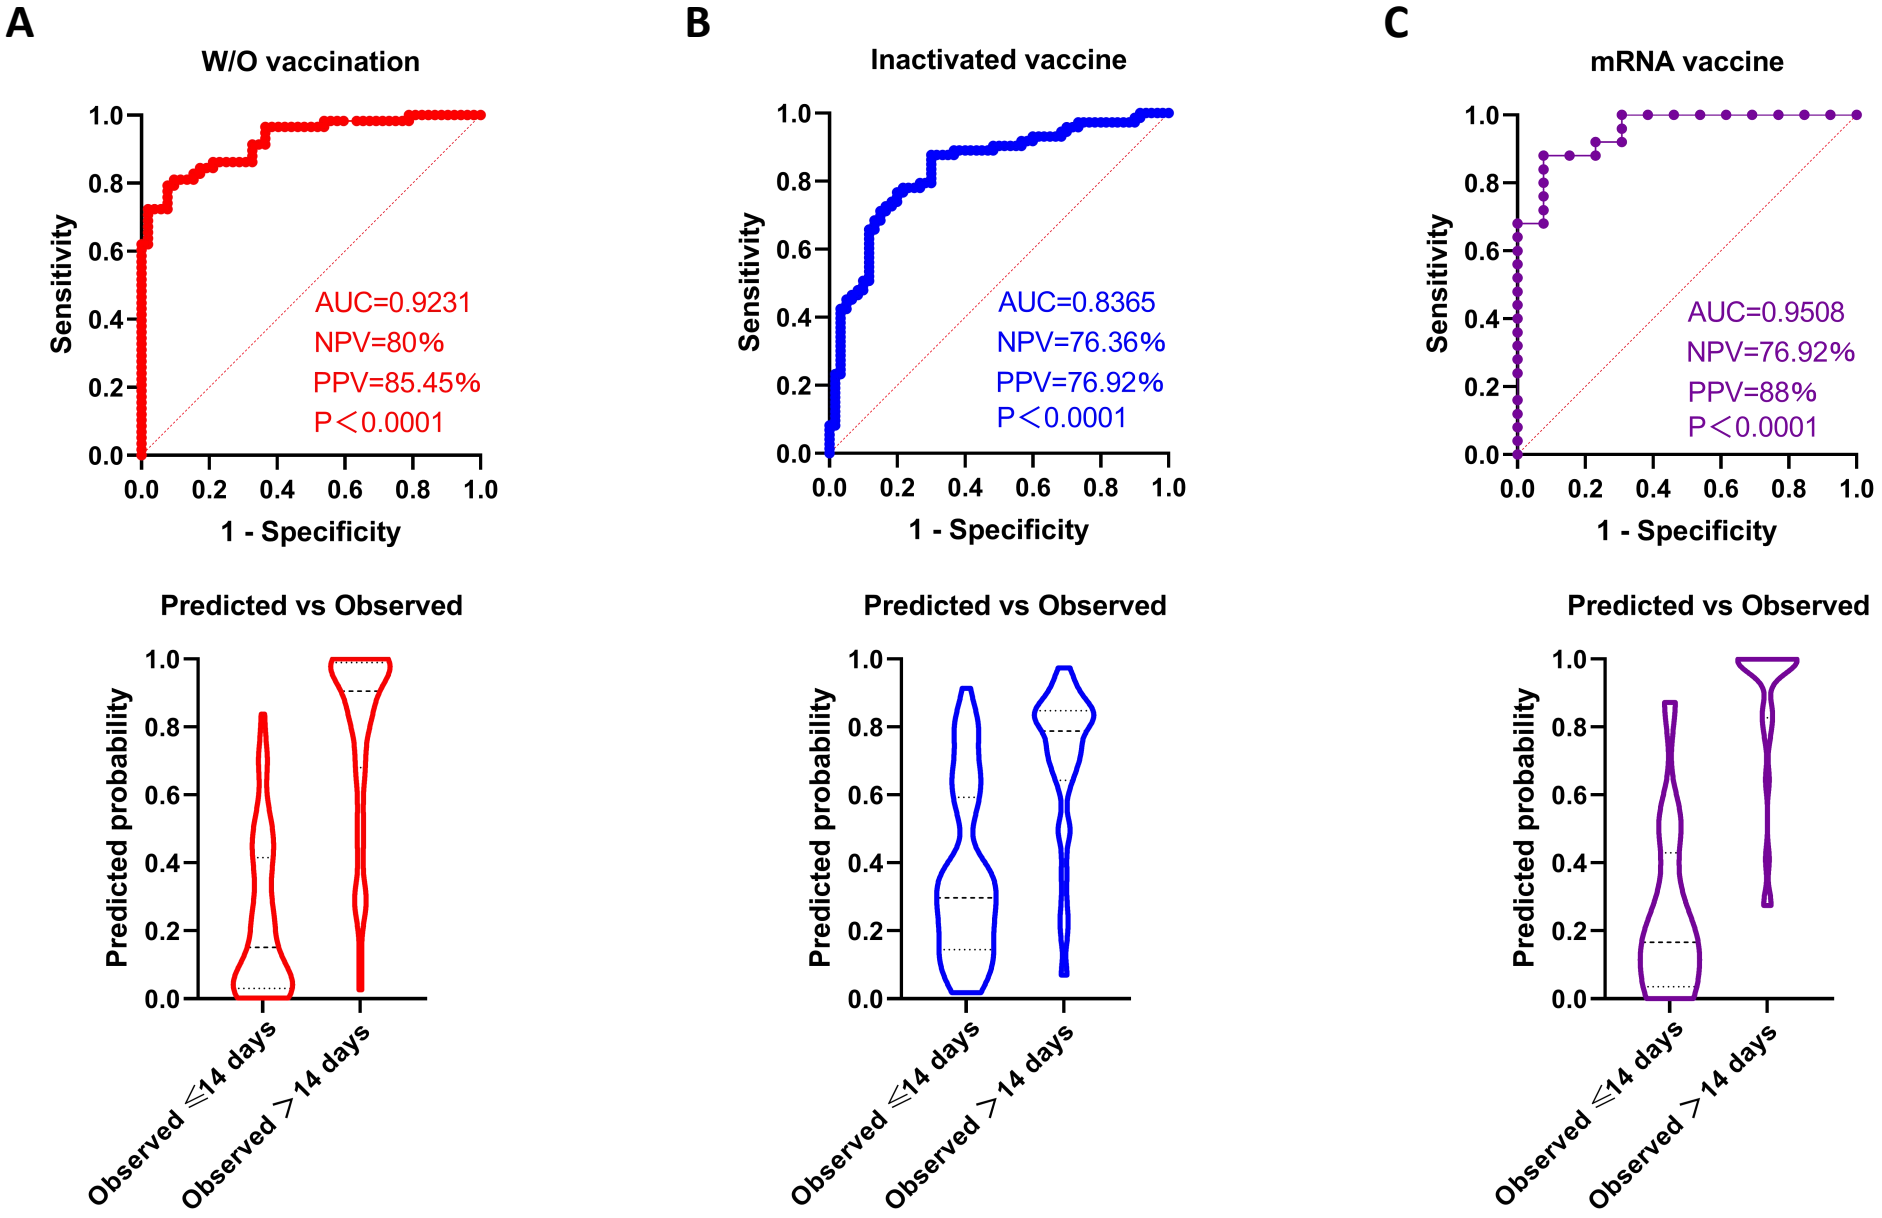

**Figure 4** Variables correlating with viral persistence in unvaccinated mild patients could discriminate between short ( $\leq 14$  days) and long ( $> 14$  days) duration of viral RNA shedding for moderate COVID-19 patients

**A**

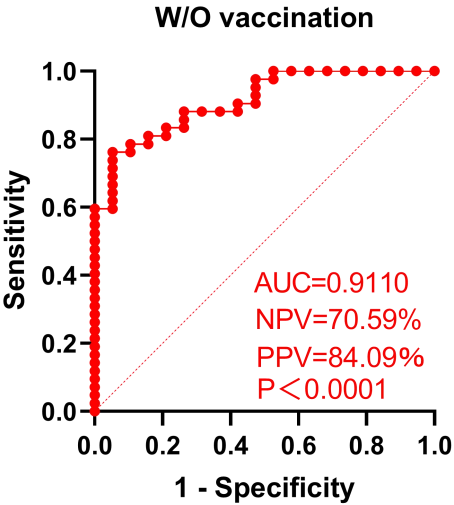

Predicted vs Observed

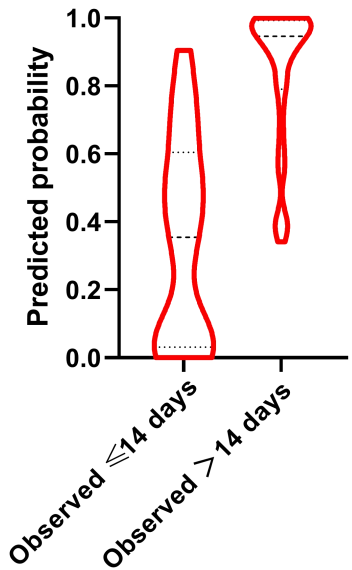

**B**

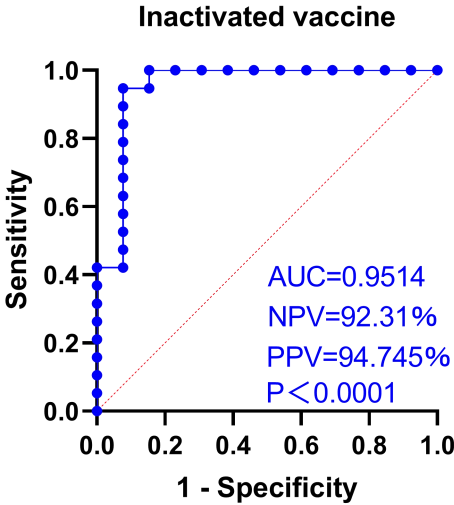

Predicted vs Observed

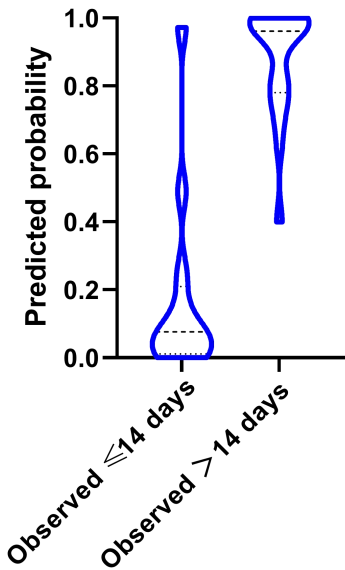

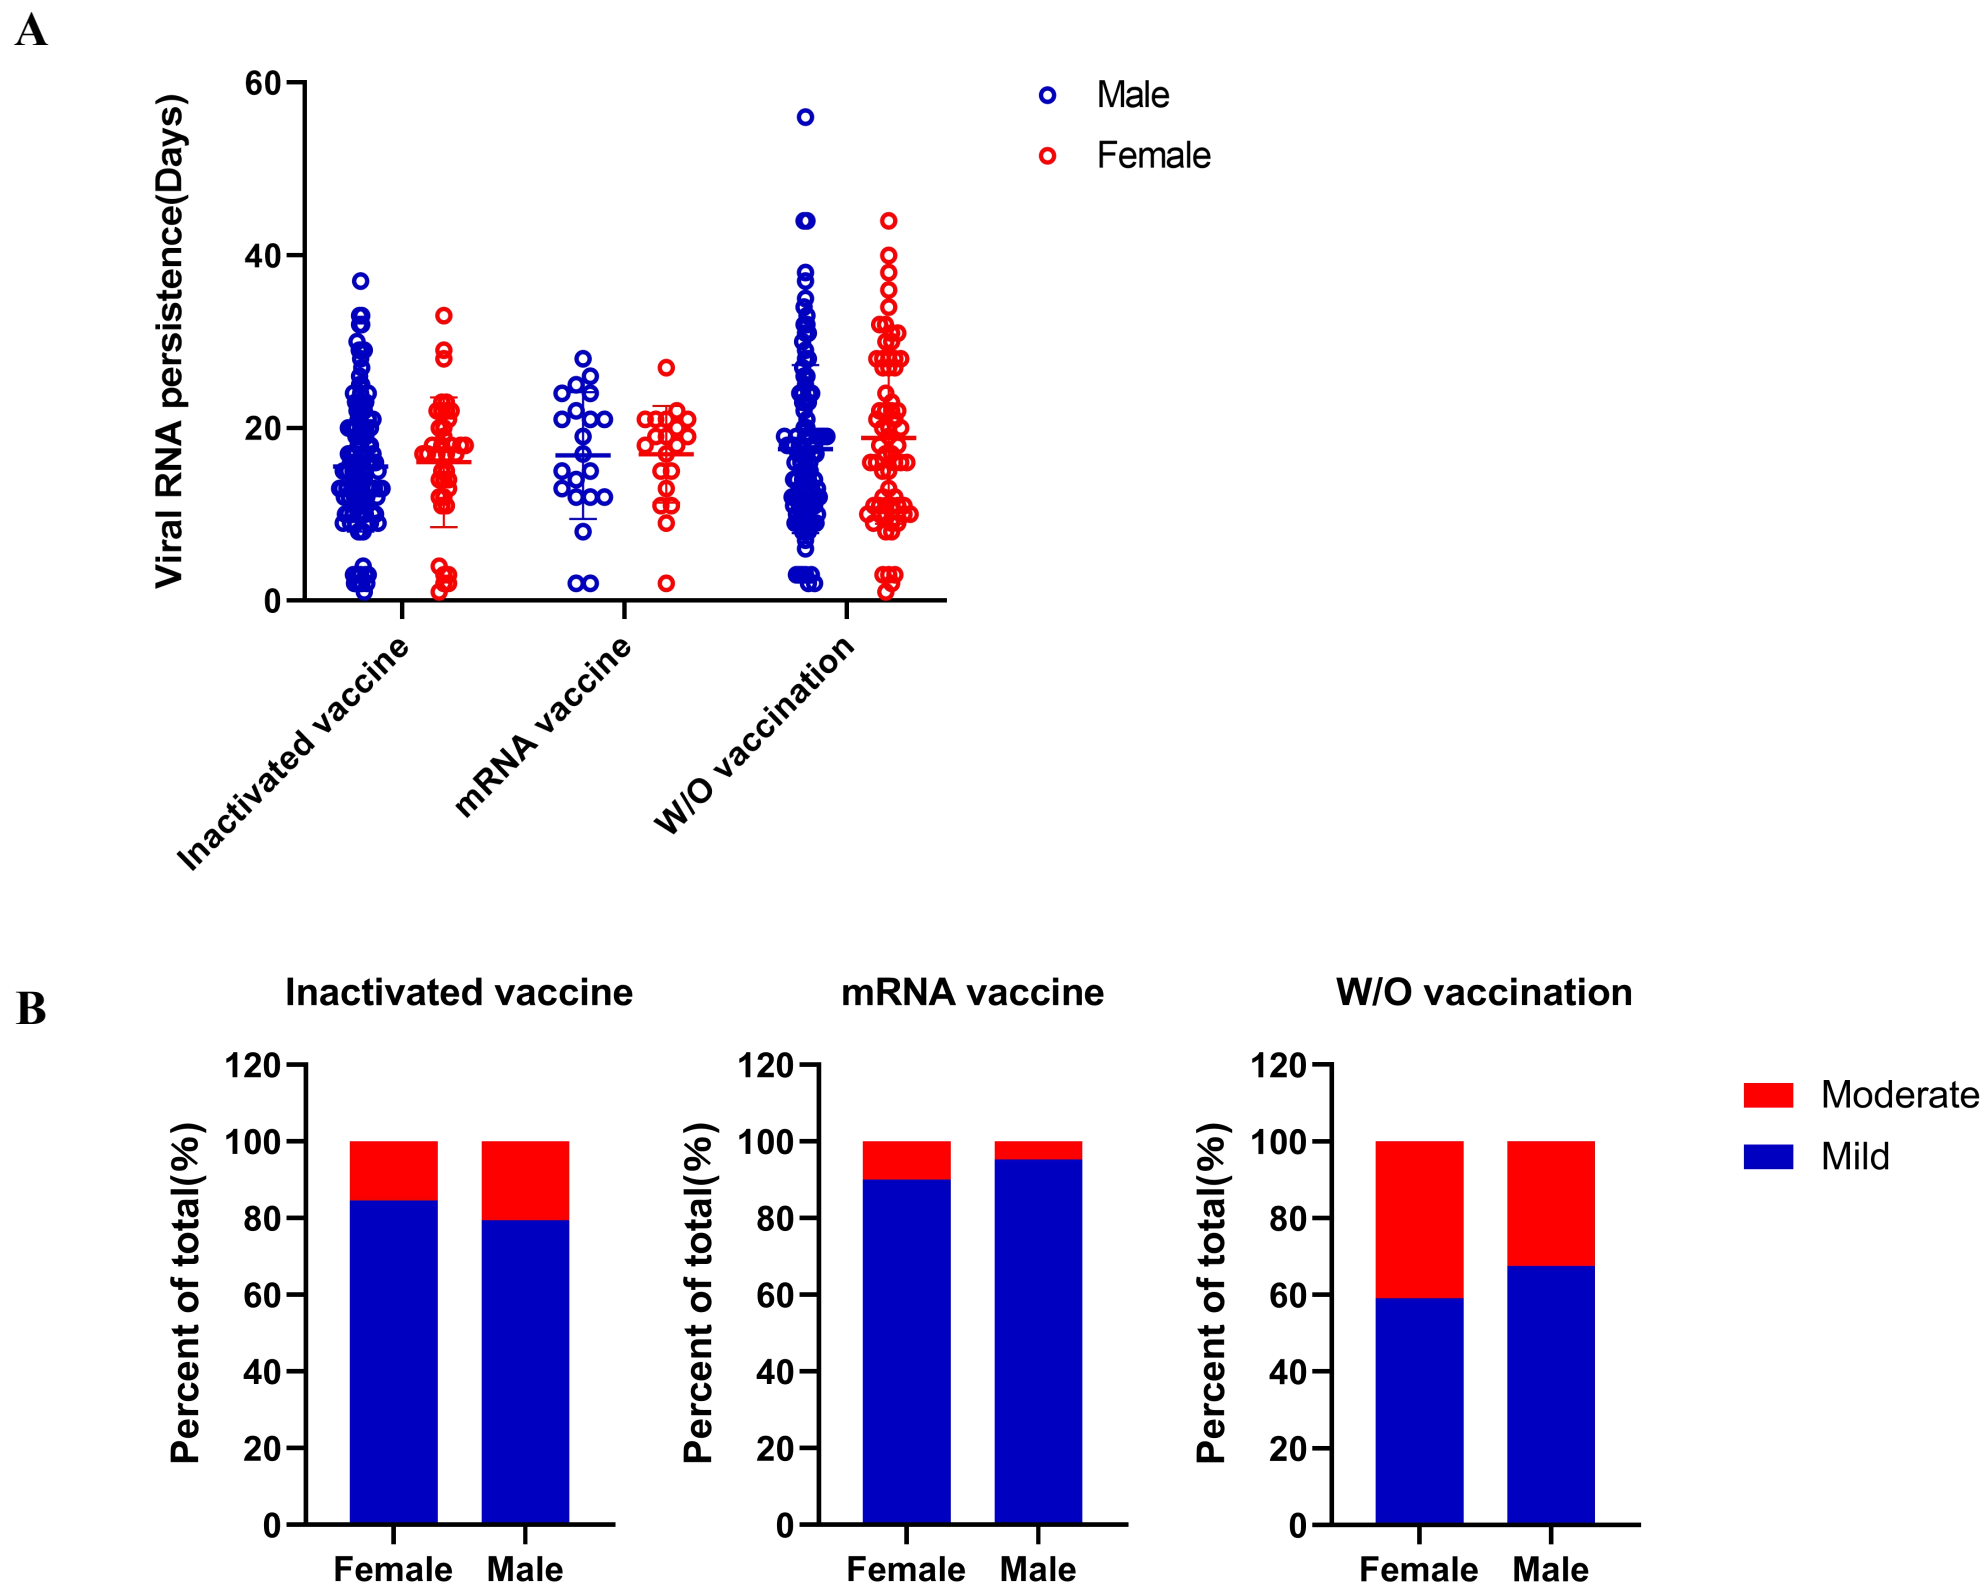

**Supplementary figure 1** The average duration of viral RNA shedding and proportions of mild and moderate COVID-19 cases were similar between male and female patients. (A) The average duration of viral RNA shedding of male patients was similar with that of female patients. (B) The proportions of mild and moderate cases in male patients were comparable with those in female patients.

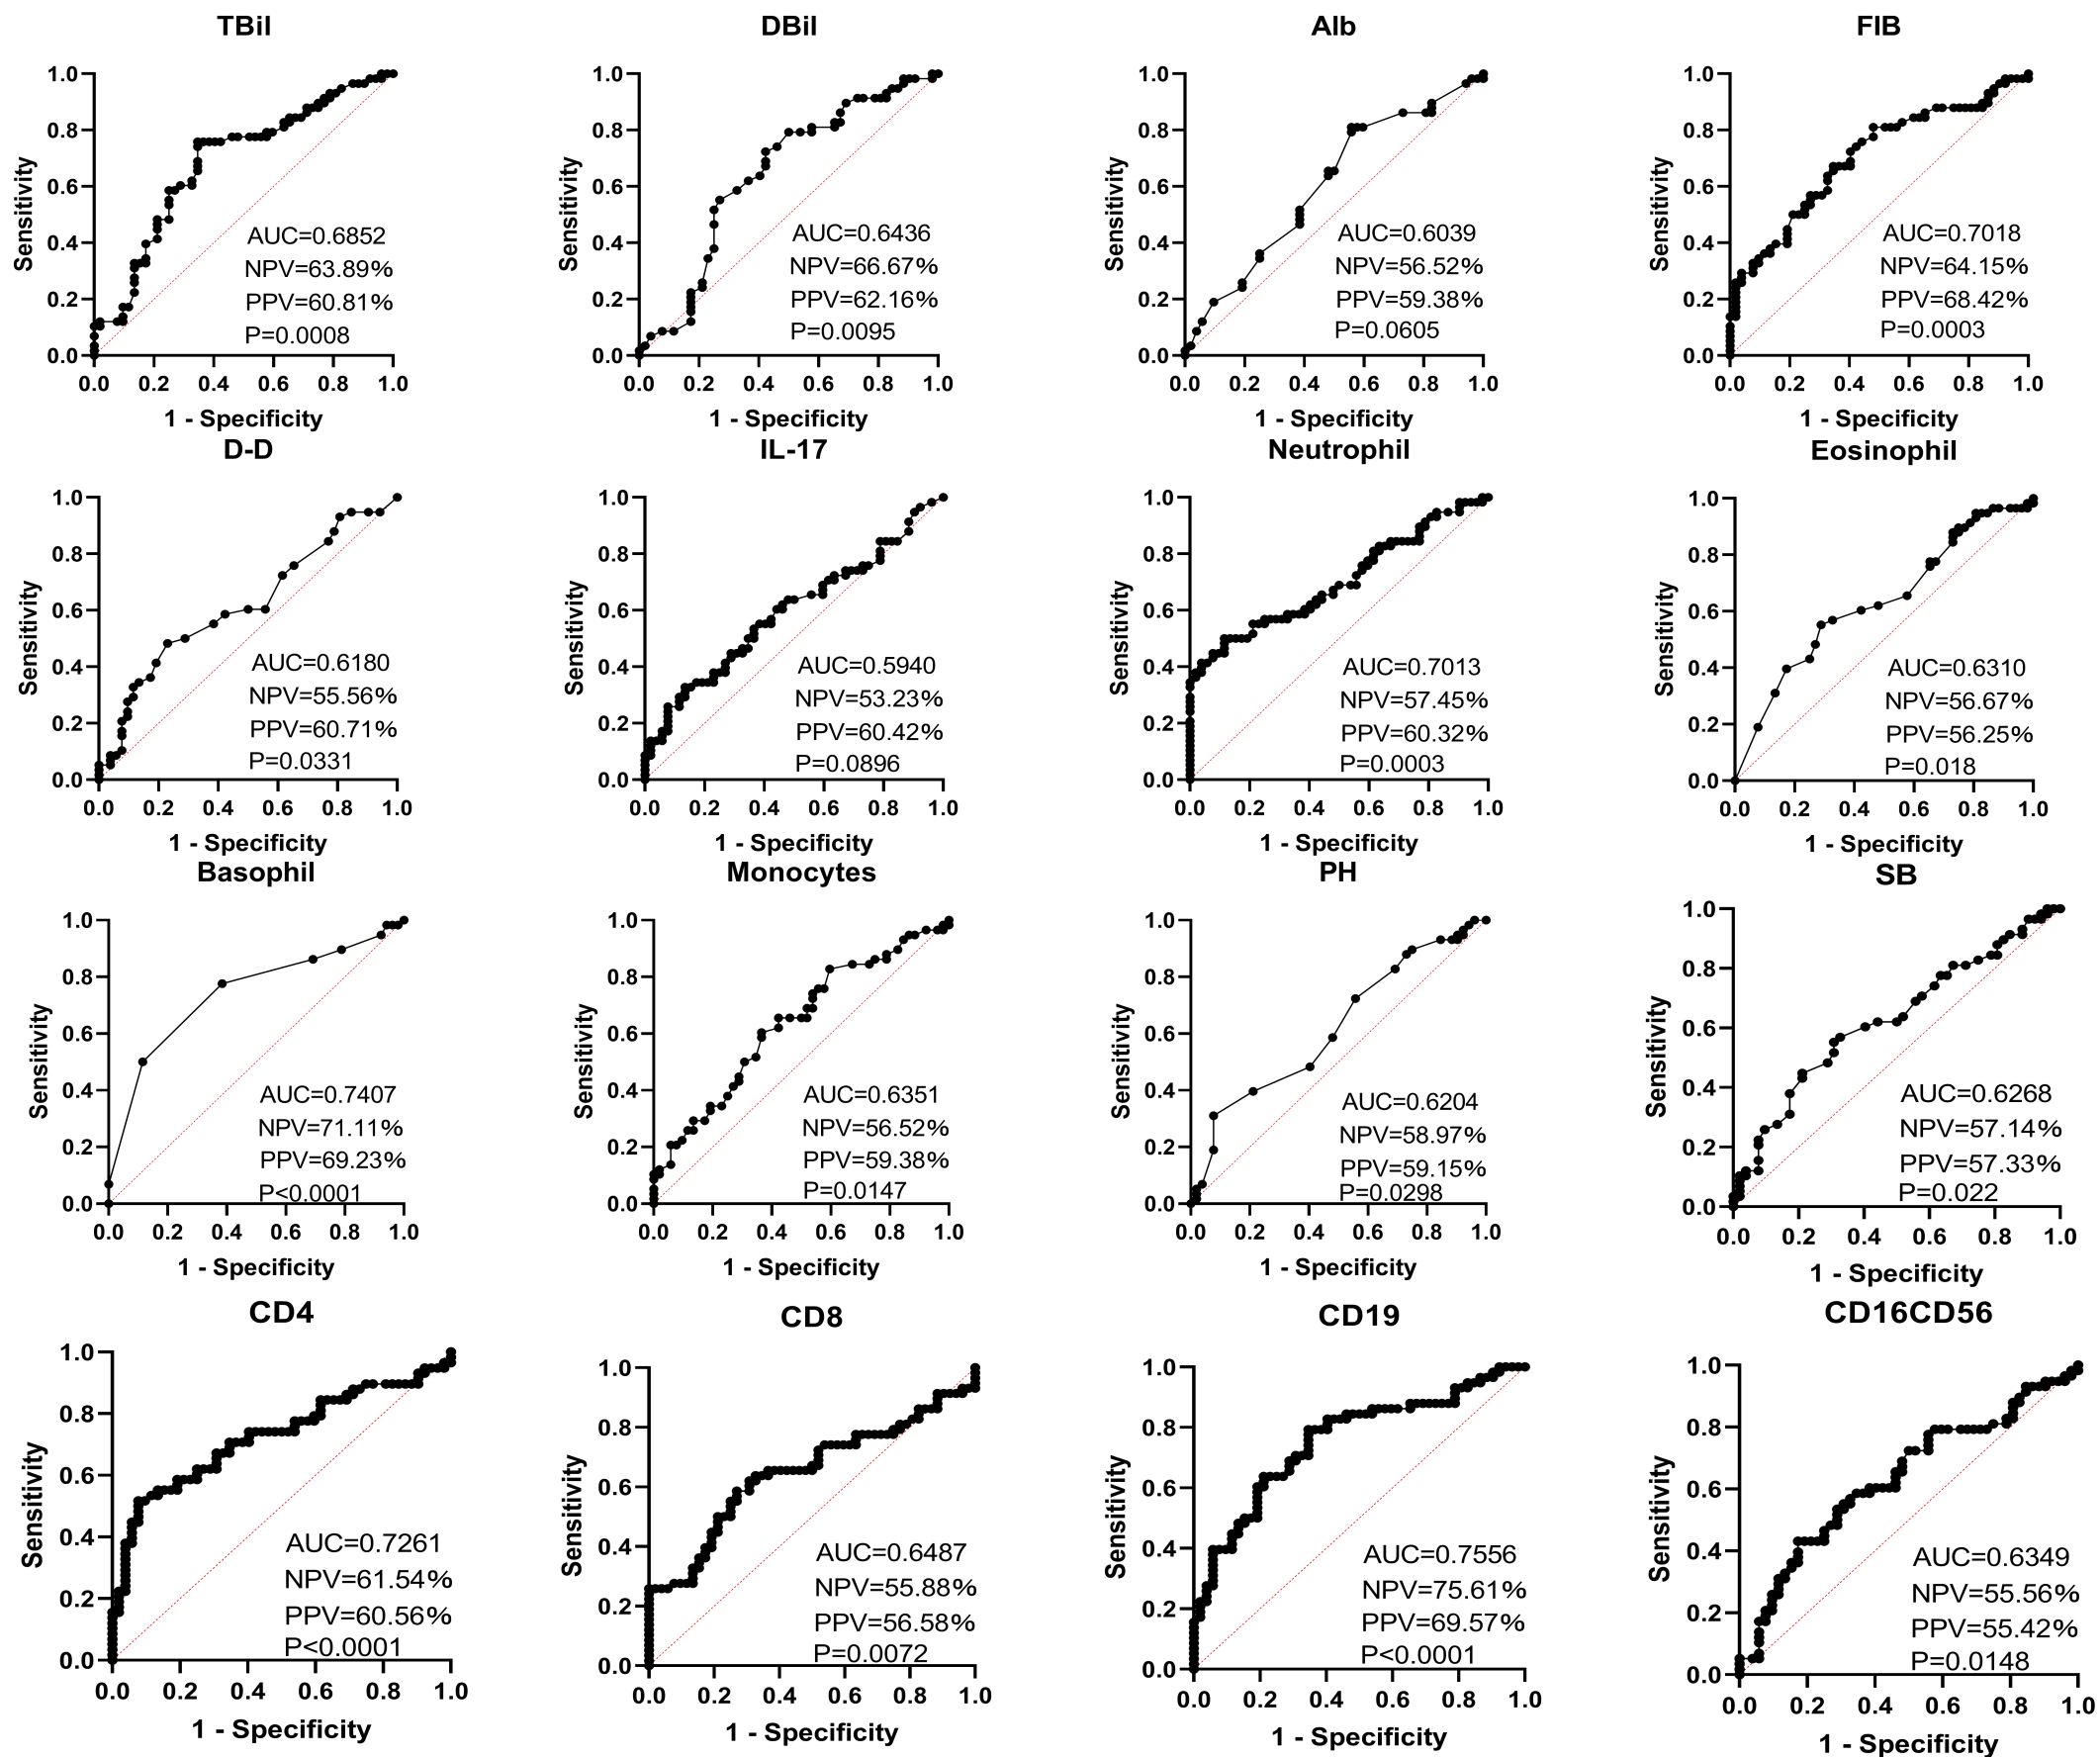

**Supplementary figure 2** Individual variables could not reliably discriminate between short ( $\leq 14$  days) and long ( $> 14$  days) duration of viral RNA shedding for unvaccinated mild COVID-19 patients. Univariate regression analyses showed that each of the significant variables identified in the correlation analyses could not confidently discriminate between short ( $\leq 14$  days) and long ( $> 14$  days) duration of viral RNA shedding for the unvaccinated mild COVID-19 patients.



**Supplementary table 1** Comparisons of demographical and laboratory variables among mild COVID-19 patients received the inactivated vaccine, the mRNA vaccine or no vaccine

| Variables                                   | Normal range | (A)<br>Inactivated vaccine<br>(N=133) | (B)<br>mRNA vaccine<br>(N=38) | (C)<br>W/O vaccination<br>(N=110) | P value<br>(A) vs (C) | P value<br>(B) vs (C) | P value<br>(A) vs (B) |
|---------------------------------------------|--------------|---------------------------------------|-------------------------------|-----------------------------------|-----------------------|-----------------------|-----------------------|
| Age (years)                                 | -            | 34.0 (24.0-43.0)                      | 29.0 (25.0-44.5)              | 31.0 (23-42.3)                    | 0.2228                | 0.7206                | 0.5906                |
| Gender (n)                                  |              |                                       |                               |                                   |                       |                       |                       |
| Male                                        | -            | 100                                   | 20                            | 71                                | 0.0901                | 0.2461                | 0.0094                |
| Female                                      | -            | 33                                    | 18                            | 39                                |                       |                       |                       |
| Time-since-vaccination<br>(Days)            | -            | 170.7±92.51                           | 149.4±62.42                   | -                                 | -                     | -                     | 0.2778                |
| Duration of virus<br>shedding (Days)        | -            | 15 (11-20)                            | 17.5 (12-21)                  | 15 (9.75-23)                      | 0.8236                | 0.5911                | 0.6551                |
| Sampling timepoint<br>(Days post diagnosis) | -            | 3 (2-3)                               | 3 (2-4)                       | 3 (2-3)                           | 0.9769                | 0.1001                | 0.0670                |
| <b>Biochemistry</b>                         |              |                                       |                               |                                   |                       |                       |                       |
| ALT (U/L)                                   | 7-40         | 18 (13-27)                            | 16 (12-26.75)                 | 17.5 (12-28)                      | 0.6663                | 0.9068                | 0.6321                |
| AST (U/L)                                   | 13-35        | 18 (15-23.5)                          | 18.5 (16.75-24)               | 18 (16-21)                        | 0.5972                | 0.3879                | 0.6472                |
| ALP (U/L)                                   | 35-100       | 67 (54.5-81.5)                        | 60.5 (55-70.5)                | 65 (53-60)                        | 0.5150                | 0.4316                | 0.1434                |
| L-γ-GGT (U/L)                               | 7-45         | 20 (15-35)                            | 20.5 (13-33)                  | 20.5 (14-30.25)                   | 0.5125                | 0.5942                | 0.2686                |
| LDH (U/L)                                   | 120-250      | 181 (159-205)                         | 190.6±48.38                   | 177 (157.8-201)                   | 0.4230                | 0.3417                | 0.6914                |
| TBil (µmol/L)                               | 3.4-20.5     | 7.8 (5.65-11.1)                       | 6.5 (4.75-8.15)               | 7.6 (5.675-10.48)                 | 0.7469                | 0.0229                | 0.0098                |
| DBil (µmol/L)                               | 0-8.6        | 4.1 (3.2-5.7)                         | 3.5 (2.975-4.3)               | 3.7 (3-4.925)                     | 0.0254                | 0.4444                | 0.0155                |
| Alb (g/L)                                   | 40-55        | 45 (43-47)                            | 44.24±2.765                   | 44.89±3.237                       | 0.7724                | 0.2695                | 0.1526                |
| Glb (g/L)                                   | 20-40        | 30 (27-33)                            | 29.16±4.290                   | 28.79±4.182                       | 0.0123                | 0.6438                | 0.0962                |

|                                           |         |                     |                      |                      |                   |                   |               |
|-------------------------------------------|---------|---------------------|----------------------|----------------------|-------------------|-------------------|---------------|
| <b>A/G (%)</b>                            | 1.2-2.4 | 1.5 (1.375-1.655)   | 1.546±0.2328         | 1.591±0.2536         | <b>0.0383</b>     | 0.3409            | 0.5021        |
| <b>K (mmol/L)</b>                         | 3.5-5.3 | 3.875±0.2996        | 3.961±0.3796         | 3.9 (3.7-4.125)      | 0.0758            | 0.8492            | 0.1475        |
| <b>Na (mmol/L)</b>                        | 137-147 | 140.2±1.885         | 141 (140-142)        | 139.9±1.812          | 0.1460            | <b>0.0042</b>     | 0.0896        |
| <b>Cl (mmol/L)</b>                        | 99-110  | 104.3±1.946         | 104.3±1.927          | 104.7±2.379          | 0.2555            | 0.3616            | 0.8335        |
| <b>Urea (mmol/L)</b>                      | 2.6-7.5 | 4 (3.3-4.65)        | 3.766±0.8438         | 3.98 (3.4-4.605)     | 0.9671            | 0.0619            | 0.0729        |
| <b>SCr (µmol/L)</b>                       | 41-73   | 76.07±15.62         | 70.22±13.58          | 70.87±13.49          | <b>0.0065</b>     | 0.7999            | <b>0.0379</b> |
| <b>Glu (mmol/L)</b>                       | 3.9-6.1 | 5.77 (5.14-6.38)    | 5.565 (5.208-6.218)  | 5.535 (4.948-6.553)  | 0.4672            | 0.5734            | 0.8831        |
| <b>UA (µmol/L)</b>                        | 150-350 | 342.8±91.94         | 313.1±98.38          | 333.1±86.62          | 0.4024            | 0.2392            | 0.0862        |
| <b>eGFR (mL/ (min*1.73m<sup>2</sup>))</b> | >90     | 104.2±17.67         | 104.2 (95.29-113.3)  | 111.1±19.51          | <b>0.0044</b>     | 0.1141            | 0.4159        |
| <b>Mb(ng/mL)</b>                          | <25     | 7.890 (5.325-10.32) | 8.620 (6.210-13.25)  | 8.495 (5.555-11.97)  | 0.2868            | 0.6174            | 0.2159        |
| <b>NT-proBNP (pg/mL)</b>                  | 0-500   | 69.30 (61.45-181.5) | 64.65 (60.83-96.38)  | 70.51 (60.7-178.9)   | 0.8380            | 0.2436            | 0.1946        |
| <b>CK Isoenzyme (ng/mL)</b>               | <5      | 0.46 (0.3-1.1)      | 0.7195±0.5253        | 1.21 (0.6-1.82)      | <b>&lt;0.0001</b> | <b>0.0002</b>     | 0.4459        |
| <b>Blood coagulation</b>                  |         |                     |                      |                      |                   |                   |               |
| <b>INR</b>                                | 0.8-1.3 | 0.94 (0.91-0.98)    | 0.9368±0.0599        | 0.96 (0.91-1.013)    | 0.1000            | 0.0774            | 0.5193        |
| <b>PTA (%)</b>                            | 75-100  | 111.5±13.62         | 109.5 (105-122.5)    | 108 (96-118.3)       | 0.0623            | 0.0803            | 0.5817        |
| <b>PT(S)</b>                              | 11-14.3 | 12.6 (12.2-13)      | 12.52±0.6475         | 12.8 (12.3-13.43)    | <b>0.0348</b>     | <b>0.0157</b>     | 0.3332        |
| <b>APTT(S)</b>                            | 32-43   | 39.56±4.245         | 40.38±4.284          | 40 (37.43-43.30)     | 0.5022            | 0.1611            | 0.2979        |
| <b>FIB (g/L)</b>                          | 2-4     | 3.097±0.6709        | 3.31 (2.875-3.95)    | 2.88 (2.553-3.258)   | 0.0555            | <b>0.0003</b>     | <b>0.0134</b> |
| <b>FDP (µg/mL)</b>                        | 0-5     | 1.5 (1.13-2.185)    | 1.295 (0.9975-1.615) | 1.620 (0.6425-3.130) | 0.7372            | 0.2508            | <b>0.0246</b> |
| <b>D-D (µg/mL)</b>                        | 0-0.5   | 0.2000 (0.16-0.295) | 0.2100 (0.18-0.235)  | 0.2200 (0.17-0.2725) | 0.6326            | 0.5744            | 0.9049        |
| <b>TT (S)</b>                             | 14-21   | 16 (15.35-16.95)    | 15.6 (14.68-16)      | 16.15 (15.5-16.6)    | 0.7475            | <b>0.0003</b>     | <b>0.0023</b> |
| <b>ESR (mm/h)</b>                         | 0-20    | 7 (4-13)            | 8.5 (4-19.75)        | 10 (5-22)            | <b>0.0008</b>     | 0.2571            | 0.2900        |
| <b>Cytokine</b>                           |         |                     |                      |                      |                   |                   |               |
| <b>IL-2 (pg/mL)</b>                       | <7.5    | 1.38 (0.27-3.41)    | 2.19 (0.52-4.118)    | 0.235 (0-0.9725)     | <b>&lt;0.0001</b> | <b>&lt;0.0001</b> | 0.1063        |

|                              |           |                     |                      |                      |         |         |        |
|------------------------------|-----------|---------------------|----------------------|----------------------|---------|---------|--------|
| <b>IL-8 (pg/mL)</b>          | <20.6     | 12.77 (0-60.27)     | 55.5 (0-165.5)       | 0.115 (0-2.01)       | <0.0001 | <0.0001 | 0.0286 |
| <b>IL-10 (pg/mL)</b>         | <12.9     | 1.51 (0.42-2.475)   | 1.135 (0.4475-2.488) | 0.78 (0.3125-1.623)  | 0.0005  | 0.0627  | 0.6751 |
| <b>IL-17 (pg/mL)</b>         | <21.4     | 3.52 (1.48-56.29)   | 57.68 (2.698-71.63)  | 1.065 (0.1925-2.505) | 0.0005  | <0.0001 | 0.0016 |
| <b>Leucocyte count</b>       |           |                     |                      |                      |         |         |        |
| <b>N (×10<sup>9</sup>/L)</b> | 1.8-6.3   | 3.59 (2.7-4.675)    | 3.848±1.379          | 3.828±1.486          | 0.7770  | 0.9411  | 0.7468 |
| <b>E (×10<sup>9</sup>/L)</b> | 0.02-0.52 | 0.070 (0.03-0.13)   | 0.070 (0.02-0.1525)  | 0.070 (0.02-0.13)    | 0.6821  | 0.5316  | 0.7789 |
| <b>B (×10<sup>9</sup>/L)</b> | 0-0.06    | 0.0200 (0.01-0.03)  | 0.0200 (0.01-0.03)   | 0.0200 (0.01-0.03)   | 0.9393  | 0.5578  | 0.5792 |
| <b>M (×10<sup>9</sup>/L)</b> | 0.1-0.6   | 0.57 (0.435-0.705)  | 0.525 (0.438-0.745)  | 0.54 (0.42-0.66)     | 0.3459  | 0.3953  | 0.8106 |
| <b>CD4 (cell/μL)</b>         | 410-1590  | 496.5 (365.1-735.5) | 582.4±235            | 600.5 (404.5-824.1)  | 0.0601  | 0.4985  | 0.5421 |
| <b>CD8 (cell/μL)</b>         | 190-1140  | 388.4 (239.6-526.1) | 381.0 (285.6-492.3)  | 371.6 (257.4-583.5)  | 0.4456  | 0.8143  | 0.7625 |
| <b>CD19 (cell/μL)</b>        | 107-698   | 152.3 (99.97-267.2) | 187±92.56            | 193.7 (111.3-303.9)  | 0.0218  | 0.2723  | 0.5324 |
| <b>CD16CD56 (cell/μL)</b>    | 95-640    | 254.0 (166-356)     | 276.7±158.7          | 229.0 (145-342.5)    | 0.2926  | 0.5310  | 0.9256 |
| <b>CD4/CD8</b>               | 0.9-3.6   | 1.480 (1.12-1.85)   | 1.350 (1.088-1.633)  | 1.452 (1.167-1.86)   | 0.7462  | 0.2349  | 0.3016 |
| <b>Arterial blood gas</b>    |           |                     |                      |                      |         |         |        |
| <b>pH</b>                    | 7.35-7.45 | 7.37 (7.34-7.39)    | 7.36 (7.348-7.38)    | 7.38 (7.36-7.4)      | 0.0694  | 0.0230  | 0.3442 |
| <b>pCO<sub>2</sub> (KPa)</b> | 4.3-6     | 5.952±0.6798        | 6.005 (5.718-6.323)  | 5.685±0.5314         | 0.0009  | 0.0005  | 0.4094 |
| <b>pO<sub>2</sub> (KPa)</b>  | 10-14     | 13.60 (12.2-14.9)   | 14.04±2.162          | 13.45 (12.48-15.03)  | 0.9175  | 0.3166  | 0.2090 |
| <b>SB (mmol/L)</b>           | 21.3-24.8 | 24.30 (23.2-25)     | 24.28±1.030          | 24.10 (23.1-24.83)   | 0.2988  | 0.1956  | 0.5894 |
| <b>SpO<sub>2</sub>(%)</b>    | 91.9-99   | 98.10 (97.15-98.75) | 98.35 (97.85-98.8)   | 98.10 (97.4-98.7)    | 0.4967  | 0.3560  | 0.1641 |
| <b>AB (mmol/L)</b>           | 22-29     | 25.43±1.825         | 25.8 (25.03-26.7)    | 25 (24.08-25.8)      | 0.0105  | 0.0036  | 0.4427 |

**Note:** Data conforming to the normal distribution are shown as mean ± standard deviation (SD), and data not conforming to the normal distribution are shown as the median (IQR).

**Abbreviations:** ALT, glutamic pyruvic transaminase; AST, glutamic oxalo-acetic transaminase; ALP, alkaline phosphatase; L-γ-GGT, gamma glutamyl transferase; LDH, lactate dehydrogenase; TBil, total bilirubin; DBil, Direct Bilirubin; Alb, albumin; globulin; SCr, serum creatinine; Glu, glucose; UA, uric acid; eGFR, estimated glomerular filtering rate; INR, international normalized ratio; PTA, prothrombin activity prothrombin time activity; PT, Prothrombin

time; APTT, activated partial thromboplastin time; FIB, Fibrinogen; FDP, fibrin/fibrinogen degradation products; D-D, D-dimer; TT, thrombin time; Mb, myoglobin; NT-proBNP, N terminal pro B type natriuretic peptide; CK Isoenzyme, creatine kinase isoenzyme; ESR, erythrocyte sedimentation rate; N, neutrophil; E, eosinophil; B, basophil; M, monocyte; SB, standard bicarbonate; AB, actual bicarbonate.
